# Supplementary material for: Preparation of graphene oxide/bio-based elastomer nanocomposites through polymer design and interface tailoring
Source: Royal Society of Chemistry journal article supplement (doi:10.1039/c5py00720h), 2015-01-01
Supplement: c5py00720h1.pdf [file c5py00720h1.pdf]

## Electronic Supplementary Information

# Preparation of graphene oxide/bio-based elastomer nanocomposites through polymer design and interface tailoring

*He Qiao,<sup>a, b</sup> Runguo Wang,<sup>a, b</sup> Hui Yao,<sup>a</sup> Xinxin Zhou,<sup>a, b</sup> Weiwei Lei,<sup>a, b</sup> Xiaoran Hu,<sup>a, b</sup>*

*Liqun Zhang<sup>a, b, c, \*</sup>*

<sup>a</sup>State Key Laboratory of Organic–Inorganic Composites, Beijing University of Chemical Technology, Beijing 100029, China

<sup>b</sup>Key Laboratory of Beijing City for Preparation and Processing of Novel Polymer Materials, Beijing University of Chemical Technology, Beijing 100029, China

<sup>c</sup>Beijing Laboratory of Biomedical Materials, Beijing University of Chemical Technology, Beijing 100029, China

**\*Corresponding Author: Liqun Zhang**

E-mail: zhanglq@mail.buct.edu.cn.

Tel.: +86-10-64421186.

Fax: +86-10-64433964.

## Polymerization recipe for PDBIIVP

**Table S1.** Recipe for redox-initiated emulsion polymerization of PDBIIVP.

| Ingredient                        | PDBIIVP-0 | PDBIIVP-1 | PDBIIVP-2 | PDBIIVP-3 | PDBIIVP-4 | PDBIIVP-5 |
|-----------------------------------|-----------|-----------|-----------|-----------|-----------|-----------|
| Dibutyl itaconate                 | 80        | 79        | 78        | 77        | 76        | 75        |
| Isoprene /g                       | 20        | 20        | 20        | 20        | 20        | 20        |
| 4-VP /g                           | 0         | 1         | 2         | 3         | 4         | 5         |
| Deionized                         | 200       | 200       | 200       | 200       | 200       | 200       |
| DPR /g                            | 3.5       | 3.5       | 3.5       | 3.5       | 3.5       | 3.5       |
| Potassium oleate                  | 1.5       | 1.5       | 1.5       | 1.5       | 1.5       | 1.5       |
| K <sub>3</sub> PO <sub>4</sub> /g | 0.2       | 0.2       | 0.2       | 0.2       | 0.2       | 0.2       |
| KCl /g                            | 0.5       | 0.5       | 0.5       | 0.5       | 0.5       | 0.5       |
| SHS /g                            | 0.2       | 0.2       | 0.2       | 0.2       | 0.2       | 0.2       |
| Fe-EDTA /g                        | 0.04      | 0.04      | 0.04      | 0.04      | 0.04      | 0.04      |
| TBH /g                            | 0.14      | 0.14      | 0.14      | 0.14      | 0.14      | 0.14      |
| HA /g                             | 0.2       | 0.2       | 0.2       | 0.2       | 0.2       | 0.2       |

## Dynamic viscoelastic properties of PDBIIVP

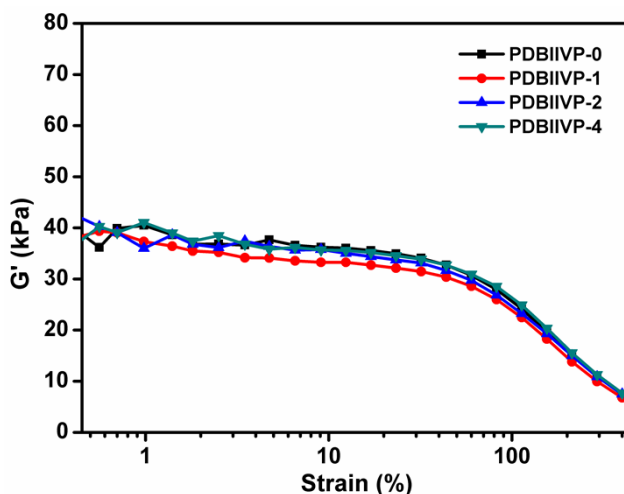

**Figure S1.** Storage modulus ( $G'$ ) versus strain curves of PDBIIVP with different 4-VP

contents.

## Dynamic mechanical thermal analysis of PDBIIVP

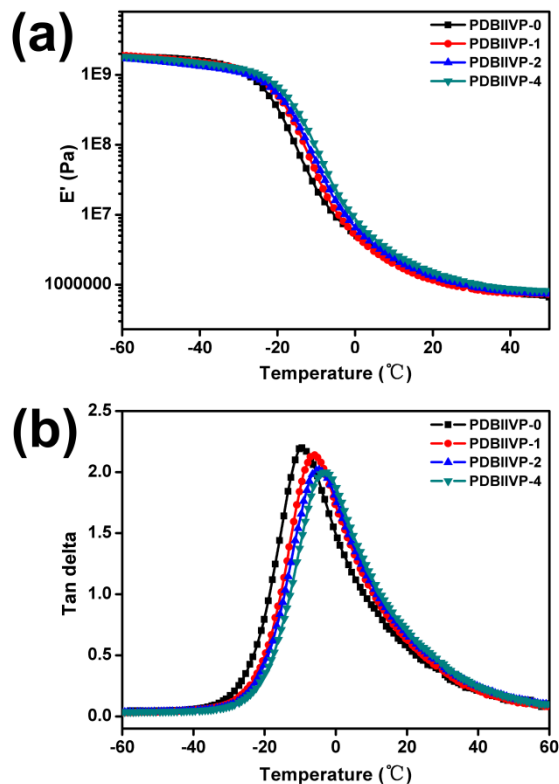

**Figure S2.** (a)  $E'$  and (b)  $\text{tan}\delta$  versus temperature of PDBIIVP with different 4-VP contents.

(The compounding formulation for crosslinked PDBIIVP is the same as that of the GO/PDBIIVP nanocomposites.)

## Mechanical properties of PDBIIVP

**Table S2.** Mechanical properties of PDBIIVP with different 4-VP contents.

| Sample | Tensile | Elongation | Stress at | Permanent | Hardness |
|--------|---------|------------|-----------|-----------|----------|
|--------|---------|------------|-----------|-----------|----------|

|           | strength<br>(MPa) | at break (%) | 100% strain<br>(MPa) | set (%) | (Shore A) |
|-----------|-------------------|--------------|----------------------|---------|-----------|
| PDBIIVP-0 | 0.8±0.1           | 216±10       | 0.4±0.02             | 0       | 22        |
| PDBIIVP-1 | 0.8±0.1           | 209±7        | 0.4±0.02             | 0       | 24        |
| PDBIIVP-2 | 1.0±0.2           | 220±16       | 0.4±0.03             | 0       | 25        |
| PDBIIVP-4 | 1.0±0.2           | 211±17       | 0.4±0.03             | 0       | 26        |

### Gas barrier properties of PDBIIVP

**Table S3.** Permeability of PDBIIVP with different 4-VP contents.

| Sample    | Permeability ( $\times 10^{-17} \text{m}^2 \text{Pa}^{-1} \text{s}^{-1}$ ) <sup>1)</sup> |
|-----------|------------------------------------------------------------------------------------------|
| PDBIIVP-0 | 8.81                                                                                     |
| PDBIIVP-1 | 8.62                                                                                     |
| PDBIIVP-2 | 8.56                                                                                     |
| PDBIIVP-4 | 8.06                                                                                     |

### Mechanical properties of GO/PDBIIVP nanocomposites with different 4-VP contents

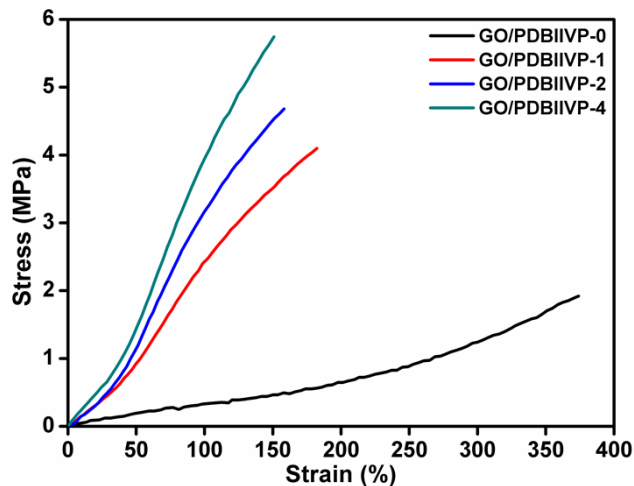

**Figure S3.** Representative stress-strain curves of GO/PDBIIVP nanocomposites with different 4-VP contents

**Mechanical properties of GO/PDBIIVP nanocomposites with different GO loadings**

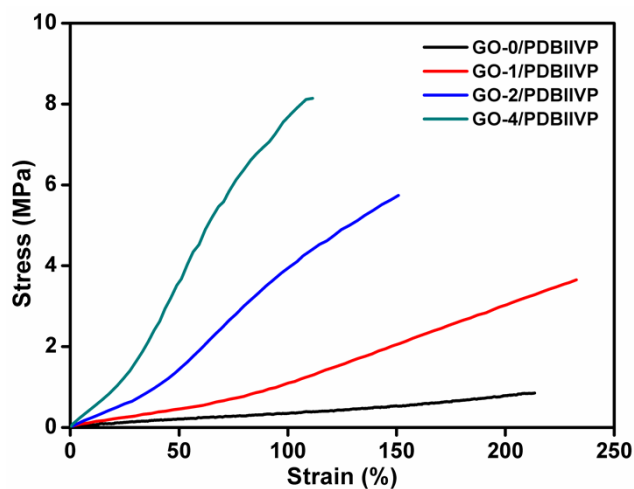

**Figure S4.** Stress-strain curves of GO/PDBIIVP nanocomposites with different GO loadings.
